# Supplementary material
Source: Springer Nature journal article supplement (https://www.springermedizin.de/resource/supplementary/12872_2014_731_MOESM1_ESM.pdf/9430766)

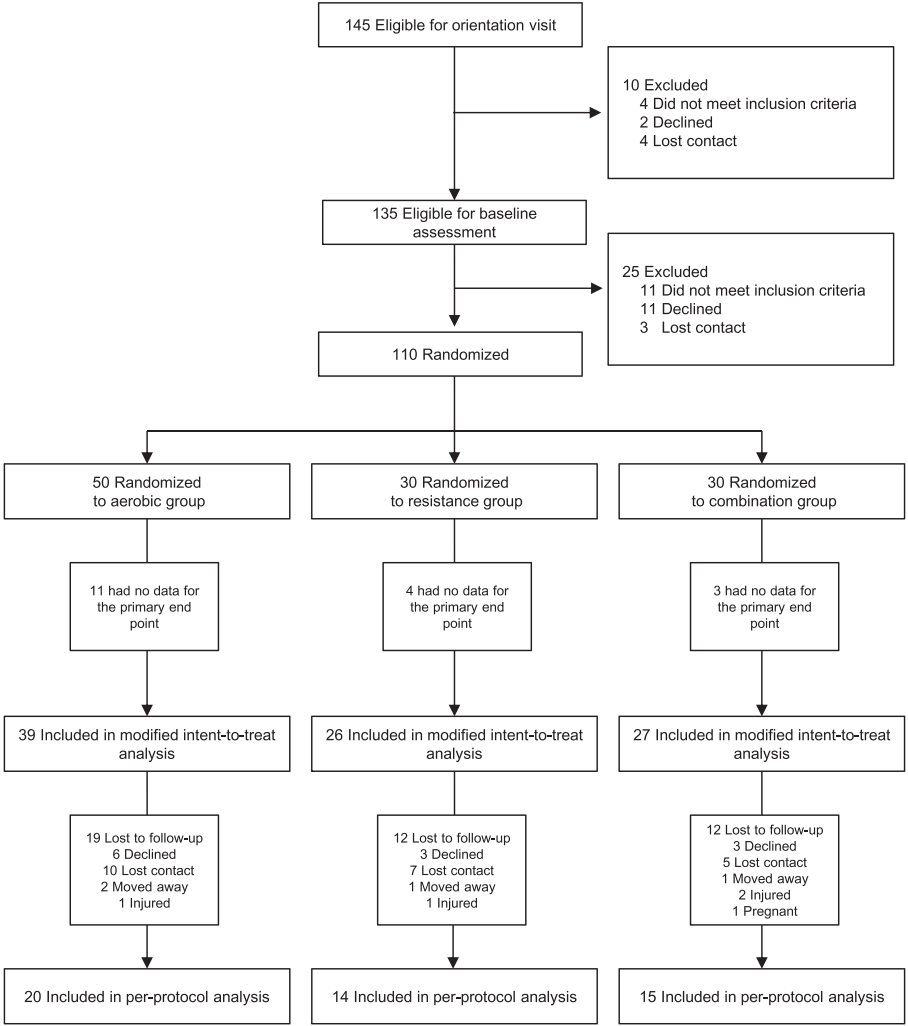

Supplement: MOESM1 [file 9430766]
